# Supplementary material for: Shaoyao-Gancao Decoction Ameliorates the Inflammation State in Polycystic Ovary Syndrome Rats via Remodeling Gut Microbiota and Suppressing the TLR4/NF-κB Pathway
Source: Frontiers journal article supplement (doi:10.3389/fphar.2021.670054), 2021-05-13

## Supplementary materials

### Part I: The quantity control of SGD.

Supplementary Fig. 1. HPLC-QTRAP-MS/MS profiles to detect SGD. 1: Oxypaeoniflorin (retention time=1.40 min); 2: Albiflorin (1.98 min); 3: Paeoniflorin (2.52 min); 4: Liquiritin (3.86 min); 5: Liquiritigenin (6.49 min); 6: Glycyrrhizin (7.09 min); 7: Glycyrrhetic acid (8.37 min); 8: genistein (6.71 min)

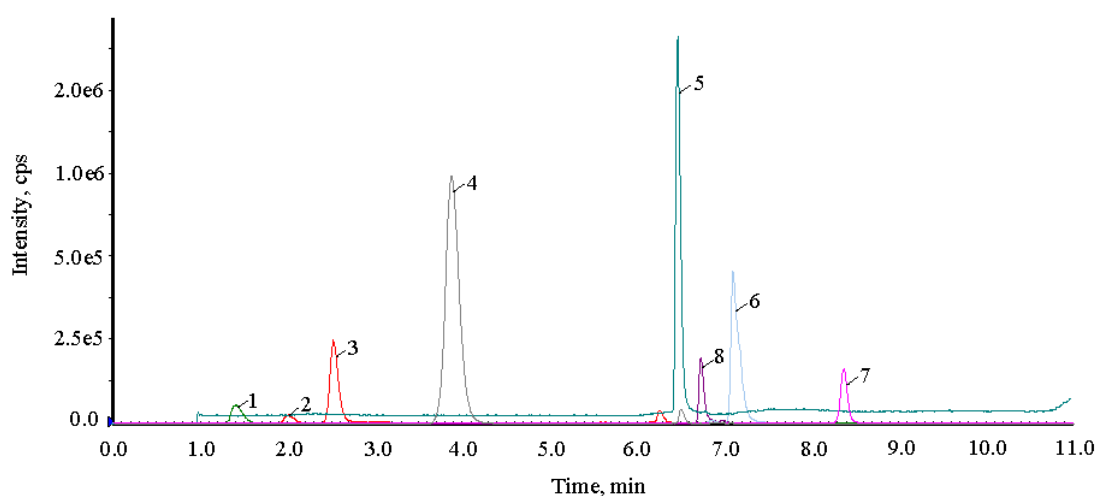

Supplementary Table 1. The regression equations of seven analytes in SGD.

| Analyte           | Regression equation    | R <sup>2</sup> |
|-------------------|------------------------|----------------|
| Oxypaeoniflorin   | $y = 0.0017x - 0.0188$ | 0.9969         |
| Albiflorin        | $y = 0.0001x - 0.0004$ | 0.9962         |
| Paeoniflorin      | $y = 0.0003x - 0.0059$ | 0.9923         |
| Liquiritin        | $y = 0.0121x - 0.0023$ | 0.9998         |
| Liquiritigenin    | $y = 0.014x - 0.0014$  | 0.9993         |
| Glycyrrhizin      | $y = 0.0001x + 0.0008$ | 0.9977         |
| Glycyrrhetic acid | $y = 0.001x - 0.0178$  | 0.9991         |

### Part II: The SGD and LPS concentrations detection in vitro experiments

Supplementary Fig. 2. (A) RAW264.7 cells were exposed to the different

concentrations of SGD for 24 h, and cell viability was measured using the CCK-8 assay. The concentration of NO produced by RAW264.7 cells treated with different concentrations of LPS for 24 hours (B) and different times of LPS (100 ng/mL) (C).

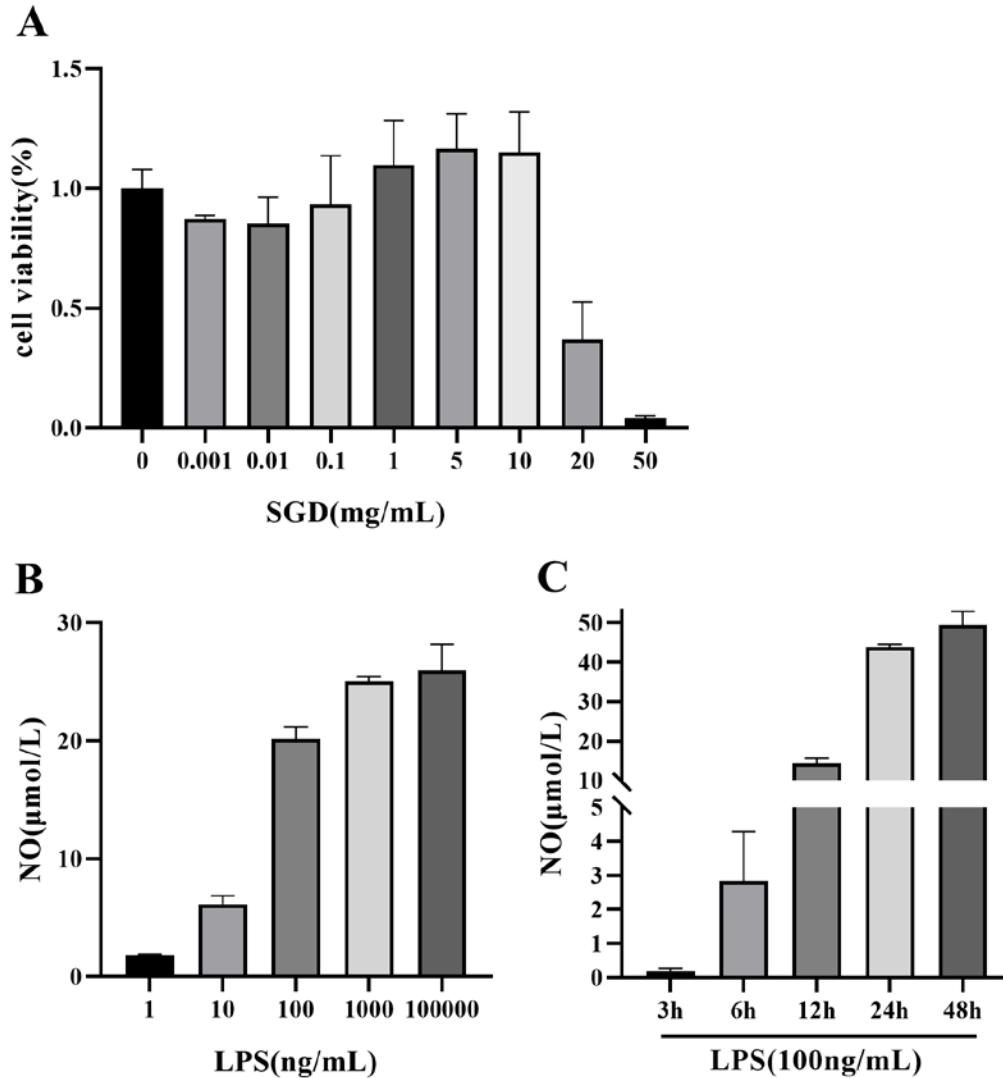

### Part III: SGD reduced the relative abundance of *Proteobacteria* in PCOS rats.

Supplementary Fig. 3. The relative abundance of *Proteobacteria* in three groups (n=10). Data were presented as mean  $\pm$  SEM. \*\* $P < 0.01$  versus normal group, ## $P < 0.01$  versus PCOS model group.

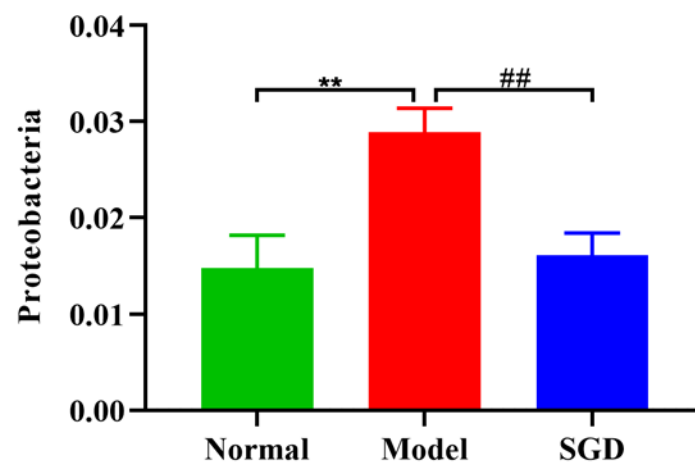

Supplement: Data_Sheet_1.PDF [file Data_Sheet_1.PDF]
